# Supplementary material for: A fruit firmness QTL identified on linkage group 4 in sweet cherry (Prunus avium L.) is associated with domesticated and bred germplasm
Source: PubMed Central journal article supplement (PMC6428808; doi:10.1038/s41598-019-41484-8), 2019-03-21
Supplement: 41598_2019_41484_MOESM1_ESM.pdf [file 41598_2019_41484_MOESM1_ESM.pdf]

**A fruit firmness QTL identified on linkage group 4 in sweet cherry (*Prunus avium* L.) is associated with domesticated and bred germplasm**

Lichun Cai<sup>1</sup>, José Quero-García<sup>2</sup>, Teresa Barreneche<sup>2</sup>, Elisabeth Dirlewanger<sup>2</sup>, Christopher Sasaki<sup>3</sup>, Amy Iezzoni<sup>1,\*</sup>

<sup>1</sup>Department of Horticulture, Michigan State University, East Lansing, MI, 48824, USA

<sup>2</sup>UMR 1332 BFP, INRA, Université de Bordeaux, F-33140 Villenave d'Ornon, France

<sup>3</sup>Department of Plant and Environmental Sciences, Clemson University, Clemson, SC, 29634, USA

\* Correspondence: [iezzoni@msu.edu](mailto:iezzoni@msu.edu)

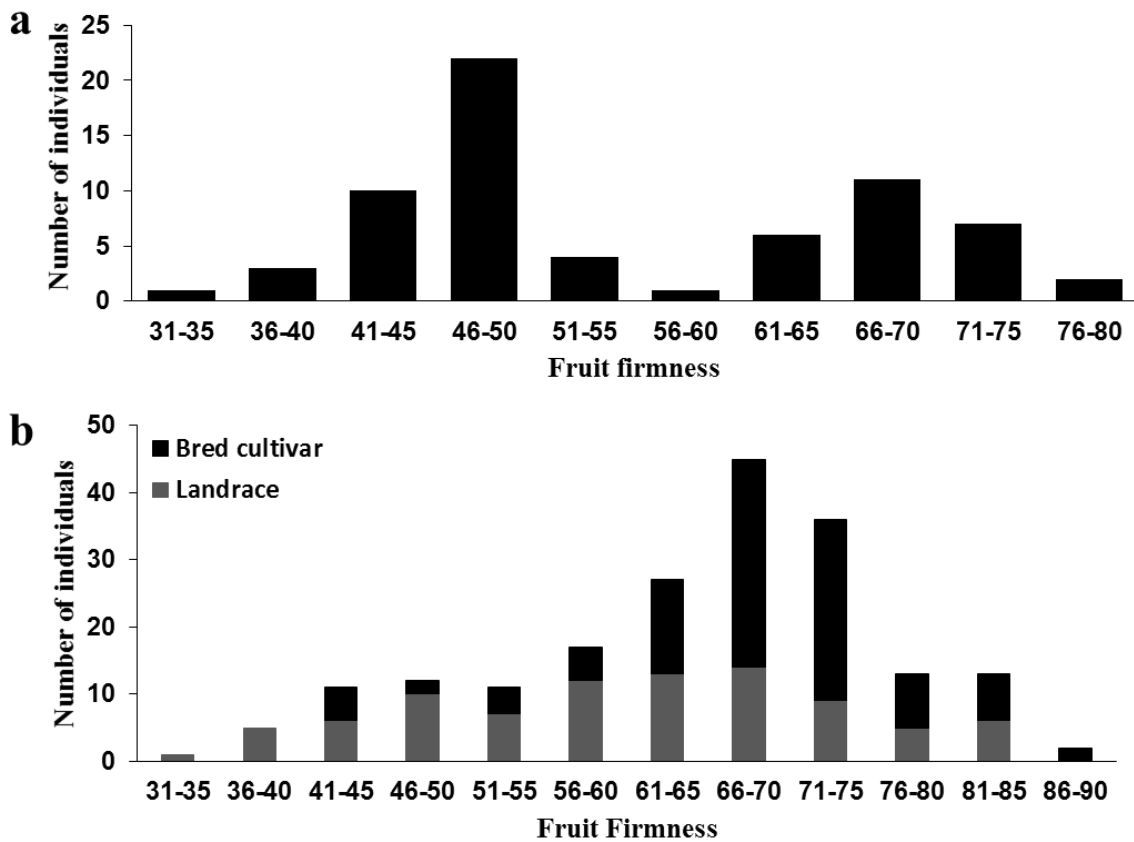

**Fig. S1.** Frequency distributions of fruit firmness for INRA's two sweet cherry populations: **(a)** Mean values of fruit firmness from six years (2009 to 2013, and 2015 to 2016) for the INRA 'Fercer' × 'X' F<sub>1</sub> population; and **(b)** Mean values of fruit firmness from two years (2014 and 2015) for the INRA sweet cherry germplasm collection.

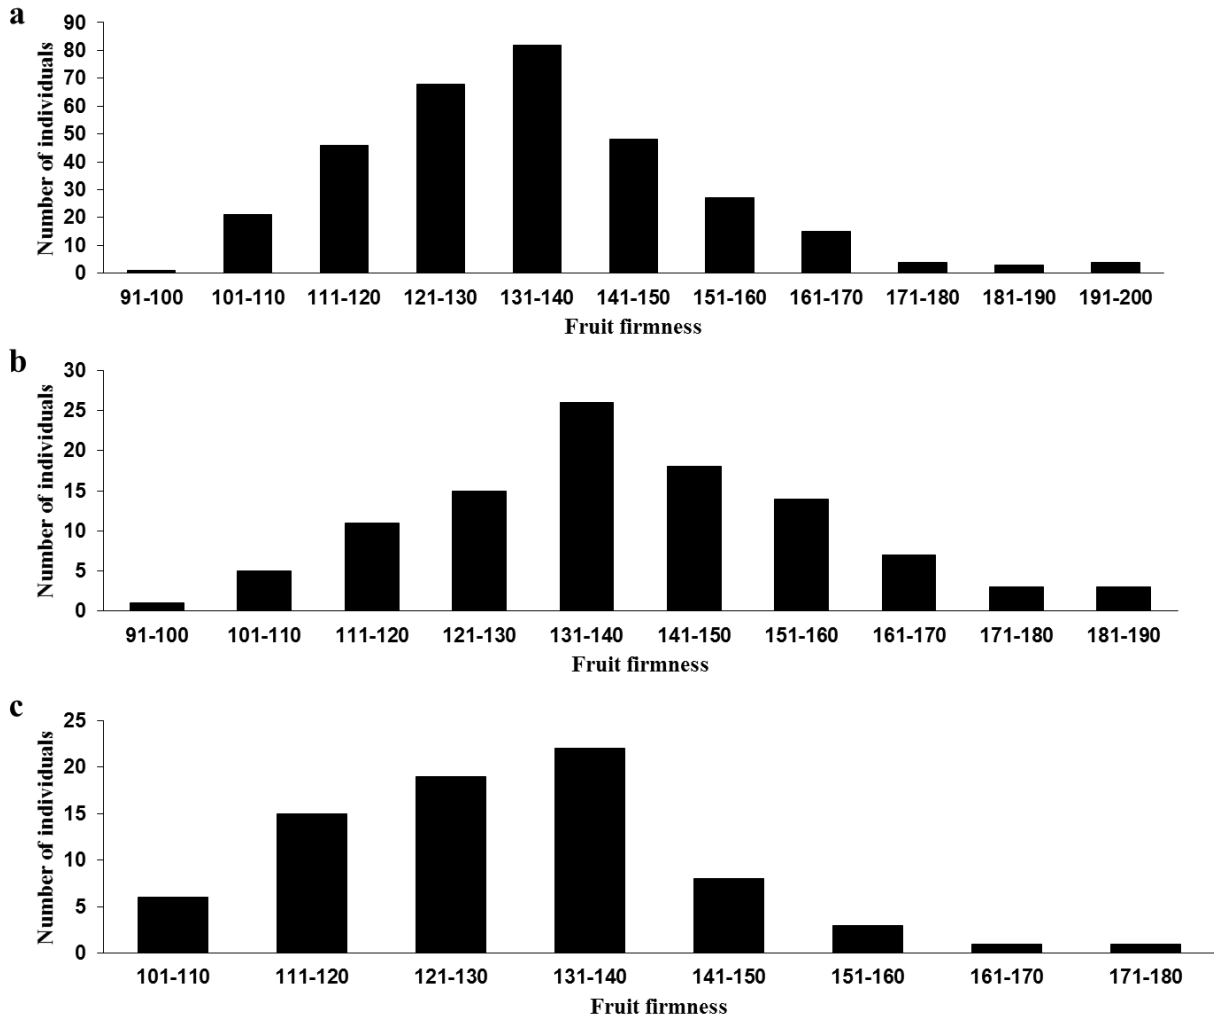

**Fig. S2.** Frequency distributions of fruit firmness for sour cherry populations: (a) all the sour cherry individuals including the five F<sub>1</sub> populations; (b) ‘M172’ × 25-02-29 F<sub>1</sub> population; (c) ‘Balaton’ × ‘Surefire’ F<sub>1</sub> population.

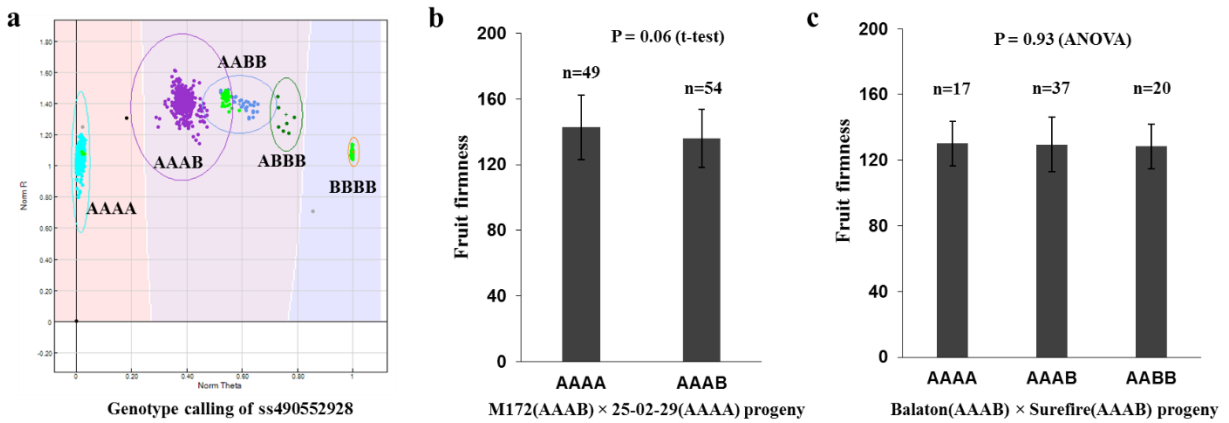

**Fig. S3.** Genotypes for the SNP marker ss490552928 in sour cherry and a comparison of the genotype means for fruit firmness. (a) Image of Genome Studio clustering for this SNP marker. Bright green identifies sweet cherry individuals used as references to identify the AA, AB and BB clusters that correspond to the AAAA, AABBB and BBBB tetraploid genotypes, respectively. All other colors correspond to sour cherries that fall within the AAAA, AAAB, AABBB and AAAB clusters. No sour cherry individuals are BBBB for SNP marker ss490552928. (b) Comparison of fruit firmness (g/mm<sup>2</sup>) between different SNP genotypes (AAAA and AAAB) in M172 × 25-02-29 progeny. (c) Comparison of fruit firmness (g/mm<sup>2</sup>) among different SNP genotypes (AAAA, AAAB and AABBB) in 'Balaton' × 'Surefire' progeny.

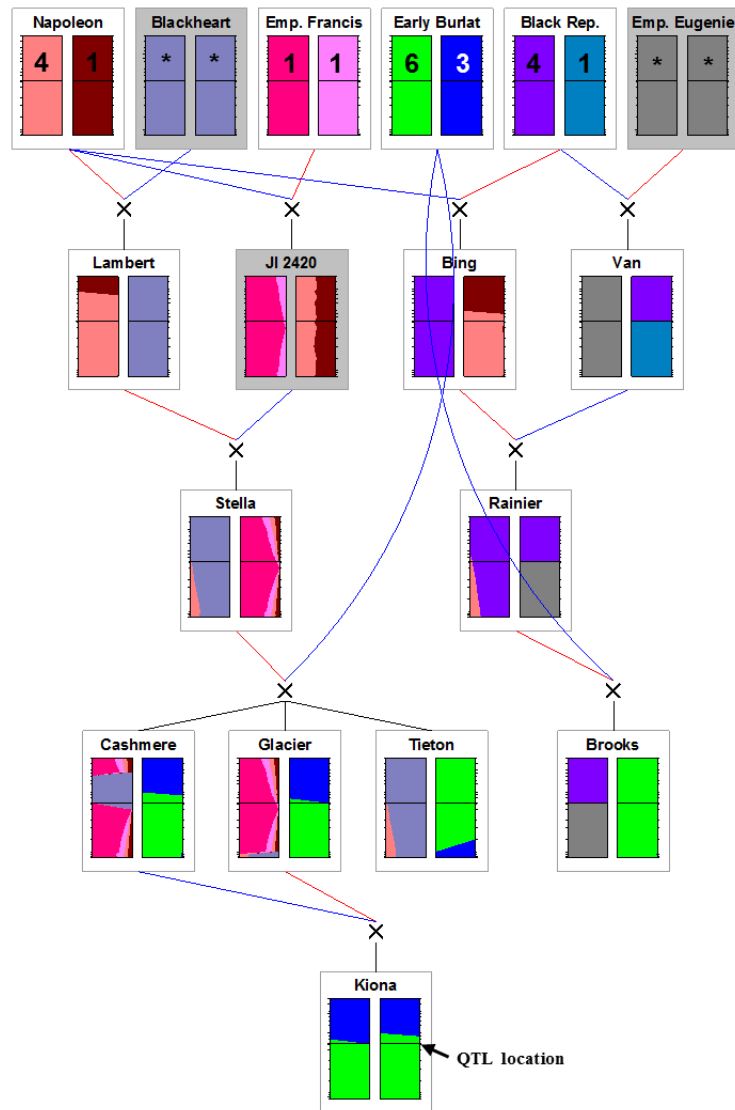

**Fig. S4.** Identity by descent (IBD) of ‘Early Burlat’ derived progeny (‘Cashmere’, ‘Glacier’, ‘Tieton’, ‘Brooks’, and ‘Kiona’) from the Washington State University sweet cherry breeding program. Each rectangle in an individual represents one of the two copies of chromosome 4, where each color represents a distinct founder chromosome. Within each individual, the one on the left was inherited from the mother (red line) and the one on the right from the father (blue line). White background color indicates an individual was genotyped and grey indicates not genotyped. For founders not genotyped (‘Empress Eugenie’ and ‘Blackheart’), the two founder

homologs were assigned the same color. The width of the color at each position along the chromosome indicates the IBD probability that the corresponding founder allele is present in this individual. The black line in each rectangle indicates the location of *qP-FF4.1* to illustrate that all the 'Early Burlat' offspring inherited the H6 haplotype. Known founder alleles (haplotypes) for *qP-FF4.1* are indicated. The images were drawn using Pedimap software<sup>1</sup>.

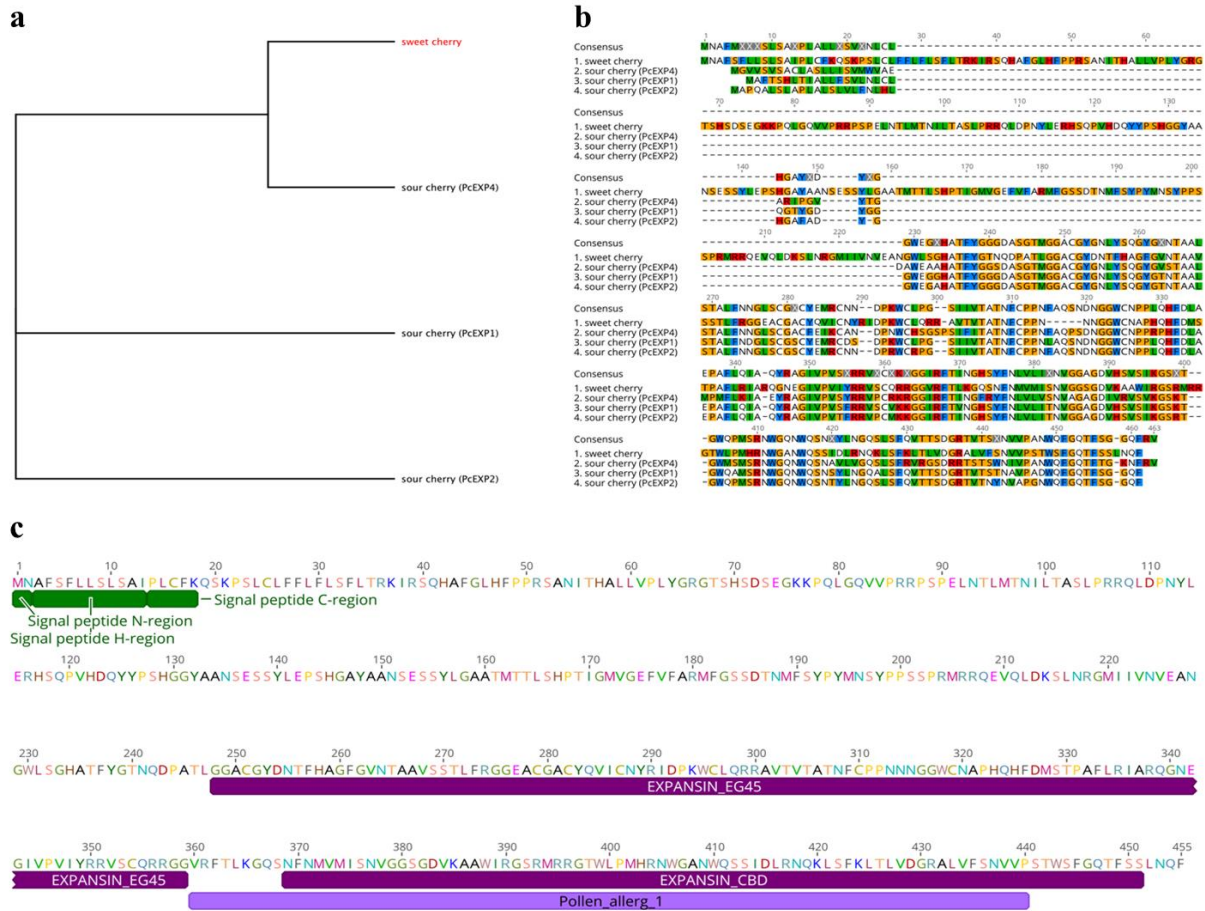

**Fig. S5.** (a) Neighbor-joining tree of the candidate sweet cherry expansin gene relative to alignment to three sour cherry expansin genes from Yoo *et al.*<sup>2</sup> (b). An amino acid alignment of the sweet cherry expansin gene with the other three sour cherry expansin genes. (c). Functional domain prediction of the expansin gene.

**Table S1.** All the QTLs identified for fruit firmness in INRA's 'Fercer' × 'X' population and RosBREED pedigreed population.

| Population          | Year | LG <sup>a</sup> | LOD <sup>b</sup> | CI (cM) <sup>c</sup> | Peak (cM)   | d <sup>d</sup>      | PVE (%) <sup>e</sup> |
|---------------------|------|-----------------|------------------|----------------------|-------------|---------------------|----------------------|
| INRA 'Fercer' × 'X' | 2009 | X4              | 10.7             | [28.4;38.0]          | 33.2        | -17.6               | 62.8                 |
|                     | 2010 | X4              | 23.3             | [30.2;38.0]          | 34.1        | -26.3               | 82.4                 |
|                     | 2011 | X4              | 18.1             | [30.0;40.1]          | 35.0        | -22.5               | 70.2                 |
|                     | 2012 | X4              | 22.4             | [31.4;39.1]          | 35.2        | -22.9               | 78.3                 |
|                     | 2013 | X4              | 11.3             | [24.9;42.8]          | 33.9        | -18.7               | 54.0                 |
|                     | 2015 | X4              | 25.9             | [30.5;38.0]          | 34.2        | -25.7               | 84.6                 |
|                     | 2016 | X4              | 17.6             | [30.8;39.0]          | 34.9        | -21.7               | 70.8                 |
|                     |      | F4              | 20.6             | [10.3;67.7]          | 39.0        | -12.1               | 20.1                 |
|                     |      | F5              | 14.3             | [76.0;88.4]          | 82.2        | 8.2                 | 10.3                 |
|                     |      | MY              | F8               | 9.8                  | [50.8;80.6] | 70.0                | 5.8                  |
|                     |      | X4              | 125.3            | [33.1;36.0]          | 34.5        | -21.9               | 70.2                 |
|                     |      | X6              | 11.8             | [47.3;64.8]          | 56.1        | -3.9                | 3.0                  |
| Population          | Year | LG              | BF <sup>f</sup>  | Interval (cM)        | Peak (cM)   | Effect <sup>g</sup> | PVE (%)              |
| RosBREED            | 2011 | 2               | 6.5              | [29;70]              | 47.0        | 23.4                | 7.4                  |
|                     | 2011 | 4               | 4.8              | [31;47]              | 33.0        | 48.0                | 16.4                 |
|                     | 2011 | 8               | 3.9              | [9;51]               | 29.0        | 48.3                | 24.6                 |
|                     | 2012 | 1               | 5.2              | [32;54]              | 45.0        | 20.0                | 4.3                  |
|                     | 2012 | 2               | 4.3              | [36;55]              | 45.0        | 17.0                | 1.8                  |
|                     | 2012 | 4               | 32.1             | [31;37]              | 33.0        | 83.0                | 83.5                 |
|                     | 2012 | 6               | 4.8              | [68;88]              | 73.0        | 21.5                | 4.4                  |

<sup>a</sup> Linkage group (LG) of 'X' (X); linkage group (LG) of 'Fercer' (F)

<sup>b</sup> Logarithm of odds ratio (LOD)

<sup>c</sup> Confidence interval (CI)

<sup>d</sup> Difference between the two homozygotes at the marker loci (d)

<sup>e</sup> Percentage of variation explained by the QTL (PVE)

<sup>f</sup> Significance was presented by Bayes Factor (BF)

<sup>g</sup> Additive effect



**Table S2.** RosBREED germplasm along with the *qP-FF4.1* FlexQTL genotype predictions and diplotypes.

| Name             | Maternal parent  | Paternal parent | Type                      | <i>QQ</i> | <i>Qq</i> | <i>qq</i> | <i>qP-FF4.1</i> diplotypes |
|------------------|------------------|-----------------|---------------------------|-----------|-----------|-----------|----------------------------|
| AA               | PMR-1            | Rainier         | Landrace or bred cultivar | 1         | 0         | 0         | H4H4                       |
| Ambrunes         | *                | *               | Landrace or bred cultivar | 1         | 0         | 0         | H1H1                       |
| BB               | PMR-1            | Rainier         | Landrace or bred cultivar | 1         | 0         | 0         | H4H4                       |
| Benton           | Stella           | Moreau          | Landrace or bred cultivar | 1         | 0         | 0         | H1H4                       |
| Bertiole         | *                | *               | Landrace or bred cultivar | 0.97      | 0.02      | 0         | H5H5                       |
| Bing             | Black Republican | Napoleon        | Landrace or bred cultivar | 0.97      | 0.03      | 0         | H4H4                       |
| Black Republican | Napoleon         | F_BR            | Landrace or bred cultivar | 0.76      | 0.24      | 0         | H1H4                       |
| Blackheart       | *                | *               | Landrace or bred cultivar | 0.76      | 0.24      | 0         | No genotypic data          |
| Brooks           | Rainier          | Early Burlat    | Landrace or bred cultivar | 1         | 0         | 0         | H4H6                       |
| Cashmere         | Stella           | Early Burlat    | Landrace or bred cultivar | 1         | 0         | 0         | H4H6                       |
| CC               | PMR-1            | Rainier         | Landrace or bred cultivar | 1         | 0         | 0         | H4H4                       |
| Chelan           | Stella           | Moreau          | Landrace or bred cultivar | 1         | 0         | 0         | H1H1                       |
| Chinook          | Bing             | Gil-Peck        | Landrace or bred cultivar | 0.74      | 0.25      | 0.01      | H4H4                       |
| Cowiche          | PC 7147-4        | PC 7146-11      | Landrace or bred cultivar | 1         | 0         | 0         | H4H4                       |
| Cristobalina     | *                | *               | Landrace or bred cultivar | 0         | 1         | 0         | H1H9                       |
| DD               | PMR-1            | Rainier         | Landrace or bred cultivar | 1         | 0         | 0         | H4H4                       |
| Dzherlo          | *                | *               | Landrace or bred cultivar | 0.76      | 0.24      | 0         | H1H4                       |
| Early Burlat     | *                | *               | Landrace or bred cultivar | 0.8       | 0.2       | 0         | H3H6                       |
| EE               | PMR-1            | Rainier         | Landrace or bred cultivar | 1         | 0         | 0         | H4H4                       |
| Emperor Francis  | *                | *               | Landrace or bred cultivar | 1         | 0         | 0         | H1H1                       |
| Empress Eugenie  | *                | *               | Landrace or bred cultivar | 0.74      | 0.26      | 0         | No genotypic data          |
| GG               | PMR-1            | Rainier         | Landrace or bred cultivar | 1         | 0         | 0         | H4H4                       |
| Giant            | *                | *               | Landrace or bred cultivar | 0.58      | 0.35      | 0.07      | No genotypic data          |
| Gil-Peck         | Napoleon         | Giant           | Landrace or bred cultivar | 0.74      | 0.25      | 0.01      | H4H4                       |
| Glacier          | Stella           | Early Burlat    | Landrace or bred cultivar | 1         | 0         | 0         | H1H6                       |
| Governor Wood    | *                | *               | Landrace or bred cultivar | 0.55      | 0.38      | 0.06      | No genotypic data          |
| Hedelfingen      | *                | *               | Landrace or bred cultivar | 0.75      | 0.25      | 0         | No genotypic data          |
| Index            | Stella           | Bing            | Landrace or bred cultivar | 1         | 0         | 0         | H1H4                       |

|                |                 |              |                           |      |      |      |                   |
|----------------|-----------------|--------------|---------------------------|------|------|------|-------------------|
| JI 2420        | Emperor Francis | Napoleon     | Landrace or bred cultivar | 0.86 | 0.14 | 0    | No genotypic data |
| JJ             | PMR-1           | Rainier      | Landrace or bred cultivar | 1    | 0    | 0    | H4H4              |
| Kiona          | Glacier         | Cashmere     | Landrace or bred cultivar | 1    | 0    | 0    | H6H6              |
| Kordia         | Schneiders      | *            | Landrace or bred cultivar | 1    | 0    | 0    | H2H5              |
| Krupnoplodnaya | *               | *            | Landrace or bred cultivar | 1    | 0    | 0    | H4H5              |
| Lambert        | Napoleon        | Blackheart   | Landrace or bred cultivar | 0.97 | 0.03 | 0    | H4H4              |
| Lapins         | Stella          | Van          | Landrace or bred cultivar | 1    | 0    | 0    | H1H4              |
| MIM 17         | *               | *            | Wild cherry               | 0    | 0    | 1    | H8H10             |
| MIM 23         | *               | *            | Wild cherry               | 0    | 0    | 1    | H11H12            |
| Moreau         | *               | *            | Landrace or bred cultivar | 0    | 1    | 0    | H1H2              |
| Napoleon       | *               | *            | Landrace or bred cultivar | 0.73 | 0.26 | 0.01 | H1H4              |
| Newstar        | Van             | Stella       | Landrace or bred cultivar | 1    | 0    | 0    | H1H4              |
| NY 54          | *               | *            | Wild cherry               | 0    | 0.05 | 0.95 | H13H13            |
| Olympus        | Lambert         | Van          | Landrace or bred cultivar | 1    | 0    | 0    | H4H4              |
| P8-79          | *               | *            | Landrace or bred cultivar | 0.98 | 0.02 | 0    | No genotypic data |
| PC 7146-11     | Stella          | Moreau       | Landrace or bred cultivar | 0.17 | 0.83 | 0    | No genotypic data |
| PC 7146-16     | Stella          | Moreau       | Landrace or bred cultivar | 1    | 0    | 0    | H1H1              |
| PC 7147-4      | Stella          | *            | Landrace or bred cultivar | 1    | 0    | 0    | No genotypic data |
| PMR-1          | *               | *            | Landrace or bred cultivar | 1    | 0    | 0    | H4H4              |
| Rainier        | Bing            | Van          | Landrace or bred cultivar | 1    | 0    | 0    | H4H4              |
| Regina         | Schneiders      | Rube         | Landrace or bred cultivar | 1    | 0    | 0    | H4H5              |
| Rube           | *               | *            | Landrace or bred cultivar | 0.73 | 0.27 | 0    | No genotypic data |
| Satonishiki    | Governor Wood   | Napoleon     | Landrace or bred cultivar | 0.57 | 0.35 | 0.08 | H1H10             |
| Schmidt        | *               | *            | Landrace or bred cultivar | 0.58 | 0.36 | 0.06 | H1H1              |
| Schneiders     | *               | *            | Landrace or bred cultivar | 0.75 | 0.25 | 0    | H5H7              |
| Selah          | P8-79           | Stella       | Landrace or bred cultivar | 1    | 0    | 0    | H1H4              |
| Stella         | Lambert         | JI 2420      | Landrace or bred cultivar | 1    | 0    | 0    | H1H4              |
| Summit         | Van             | *            | Landrace or bred cultivar | 0.99 | 0.01 | 0    | H4H4              |
| Sunburst       | Summit          | *            | Landrace or bred cultivar | 0.97 | 0.02 | 0.01 | H4H4              |
| Sweetheart     | Van             | Lapins       | Landrace or bred cultivar | 1    | 0    | 0    | H1H1              |
| Tieton         | Stella          | Early Burlat | Landrace or bred cultivar | 1    | 0    | 0    | H4H6              |

|          |                 |                  |                                          |      |      |      |       |
|----------|-----------------|------------------|------------------------------------------|------|------|------|-------|
| Ulster   | Napoleon        | Gil-Peck         | Landrace or bred cultivar                | 0.74 | 0.25 | 0.01 | H4H4  |
| Van      | Empress Eugenie | Black Republican | Landrace or bred cultivar                | 1    | 0    | 0    | H1H4  |
| Venus    | Hedelfingen     | Windsor          | Landrace or bred cultivar                | 1    | 0    | 0    | H1H4  |
| Vic      | Bing            | Schmidt          | Landrace or bred cultivar                | 0.74 | 0.25 | 0.01 | H1H4  |
| Vittoria | *               | *                | Landrace or bred cultivar                | 0.89 | 0.11 | 0    | H1H1  |
| Windsor  | *               | *                | Landrace or bred cultivar                | 0.77 | 0.23 | 0    | H1H4  |
| 23-01-11 | NY 54           | Emperor Francis  | Wild × Cultivar F <sub>1</sub> offspring | 0    | 1    | 0    | H1H13 |
| 23-01-47 | NY 54           | Emperor Francis  | Wild × Cultivar F <sub>1</sub> offspring | 0    | 1    | 0    | H1H13 |
| 23-02-34 | NY 54           | Emperor Francis  | Wild × Cultivar F <sub>1</sub> offspring | 0    | 1    | 0    | H1H13 |
| 23-02-46 | NY 54           | Emperor Francis  | Wild × Cultivar F <sub>1</sub> offspring | 0.04 | 0.96 | 0    | H1H13 |
| 23-03-13 | NY 54           | Emperor Francis  | Wild × Cultivar F <sub>1</sub> offspring | 0    | 1    | 0    | H1H13 |
| 23-03-23 | NY 54           | Emperor Francis  | Wild × Cultivar F <sub>1</sub> offspring | 0    | 1    | 0    | H1H13 |
| 23-03-24 | NY 54           | Emperor Francis  | Wild × Cultivar F <sub>1</sub> offspring | 0    | 1    | 0    | H1H13 |
| 23-03-28 | NY 54           | Emperor Francis  | Wild × Cultivar F <sub>1</sub> offspring | 0    | 1    | 0    | H1H13 |
| 23-03-40 | NY 54           | Emperor Francis  | Wild × Cultivar F <sub>1</sub> offspring | 0    | 1    | 0    | H1H13 |
| 23-03-48 | NY 54           | Emperor Francis  | Wild × Cultivar F <sub>1</sub> offspring | 0    | 1    | 0    | H1H13 |
| 23-03-56 | NY 54           | Emperor Francis  | Wild × Cultivar F <sub>1</sub> offspring | 0    | 1    | 0    | H1H13 |
| 23-05-17 | NY 54           | Emperor Francis  | Wild × Cultivar F <sub>1</sub> offspring | 0    | 1    | 0    | H1H13 |
| 23-06-04 | NY 54           | Emperor Francis  | Wild × Cultivar F <sub>1</sub> offspring | 0    | 1    | 0    | H1H13 |
| 23-06-23 | NY 54           | Emperor Francis  | Wild × Cultivar F <sub>1</sub> offspring | 0    | 1    | 0    | H1H13 |
| 23-07-26 | NY 54           | Emperor Francis  | Wild × Cultivar F <sub>1</sub> offspring | 0    | 1    | 0    | H1H13 |
| 23-08-24 | NY 54           | Emperor Francis  | Wild × Cultivar F <sub>1</sub> offspring | 0    | 1    | 0    | H1H13 |
| 23-08-45 | NY 54           | Emperor Francis  | Wild × Cultivar F <sub>1</sub> offspring | 0    | 1    | 0    | H1H13 |
| 23-08-55 | NY 54           | Emperor Francis  | Wild × Cultivar F <sub>1</sub> offspring | 0    | 1    | 0    | H1H13 |
| 9814-025 | Bing            | PMR-1            | Landrace or bred cultivar                | 1    | 0    | 0    | H4H4  |
| 9814-026 | Bing            | PMR-1            | Landrace or bred cultivar                | 1    | 0    | 0    | H4H4  |
| 9814-028 | Bing            | PMR-1            | Landrace or bred cultivar                | 1    | 0    | 0    | H4H4  |
| 9814-055 | Bing            | PMR-1            | Landrace or bred cultivar                | 1    | 0    | 0    | H4H4  |
| 9814-062 | Bing            | PMR-1            | Landrace or bred cultivar                | 1    | 0    | 0    | H4H4  |
| 9814-063 | Bing            | PMR-1            | Landrace or bred cultivar                | 0.97 | 0.03 | 0    | H4H4  |
| 9814-068 | Bing            | PMR-1            | Landrace or bred cultivar                | 0.97 | 0.03 | 0    | H4H4  |

|          |         |        |                           |      |      |   |      |
|----------|---------|--------|---------------------------|------|------|---|------|
| 9814-071 | Bing    | PMR-1  | Landrace or bred cultivar | 0.97 | 0.03 | 0 | H4H4 |
| 9814-076 | Bing    | PMR-1  | Landrace or bred cultivar | 1    | 0    | 0 | H4H4 |
| 9814-078 | Bing    | PMR-1  | Landrace or bred cultivar | 0.97 | 0.03 | 0 | H4H4 |
| 9814-103 | Bing    | PMR-1  | Landrace or bred cultivar | 0.97 | 0.03 | 0 | H4H4 |
| 9814-105 | Bing    | PMR-1  | Landrace or bred cultivar | 1    | 0    | 0 | H4H4 |
| 9816-005 | Rainier | PMR-1  | Landrace or bred cultivar | 1    | 0    | 0 | H4H4 |
| 9816-023 | Rainier | PMR-1  | Landrace or bred cultivar | 1    | 0    | 0 | H4H4 |
| 9816-041 | Rainier | PMR-1  | Landrace or bred cultivar | 1    | 0    | 0 | H4H4 |
| 9816-042 | Rainier | *      | Landrace or bred cultivar | 0.79 | 0.21 | 0 | H4H7 |
| 9816-059 | Rainier | PMR-1  | Landrace or bred cultivar | 1    | 0    | 0 | H4H4 |
| 9816-078 | Van     | PMR-1  | Landrace or bred cultivar | 1    | 0    | 0 | H4H4 |
| 9816-083 | Rainier | PMR-1  | Landrace or bred cultivar | 1    | 0    | 0 | H4H4 |
| 9816-103 | Rainier | PMR-1  | Landrace or bred cultivar | 1    | 0    | 0 | H4H4 |
| 9816-105 | Rainier | PMR-1  | Landrace or bred cultivar | 1    | 0    | 0 | H4H4 |
| 9816-106 | Rainier | PMR-1  | Landrace or bred cultivar | 1    | 0    | 0 | H4H4 |
| 9816-112 | Rainier | PMR-1  | Landrace or bred cultivar | 1    | 0    | 0 | H4H4 |
| 9819-005 | PMR-1   | Van    | Landrace or bred cultivar | 1    | 0    | 0 | H1H4 |
| 9819-031 | PMR-1   | Van    | Landrace or bred cultivar | 1    | 0    | 0 | H1H4 |
| 9819-034 | PMR-1   | Bing   | Landrace or bred cultivar | 1    | 0    | 0 | H4H4 |
| 9819-038 | PMR-1   | Van    | Landrace or bred cultivar | 1    | 0    | 0 | H4H4 |
| FR10T098 | PMR-1   | Moreau | Landrace or bred cultivar | 0    | 1    | 0 | H2H4 |
| FR10T099 | PMR-1   | Tieton | Landrace or bred cultivar | 1    | 0    | 0 | H4H4 |
| FR10T101 | PMR-1   | Moreau | Landrace or bred cultivar | 1    | 0    | 0 | H1H4 |
| FR11T015 | Rainier | Regina | Landrace or bred cultivar | 1    | 0    | 0 | H4H4 |
| FR11T016 | Rainier | Regina | Landrace or bred cultivar | 1    | 0    | 0 | H4H5 |
| FR11T017 | Rainier | Regina | Landrace or bred cultivar | 1    | 0    | 0 | H4H4 |
| FR11T018 | Rainier | Regina | Landrace or bred cultivar | 1    | 0    | 0 | H4H5 |
| FR11T019 | Rainier | Regina | Landrace or bred cultivar | 1    | 0    | 0 | H4H5 |
| FR11T025 | Rainier | Regina | Landrace or bred cultivar | 1    | 0    | 0 | H4H5 |
| FR11T026 | Rainier | Regina | Landrace or bred cultivar | 1    | 0    | 0 | H4H5 |
| FR11T027 | Rainier | Regina | Landrace or bred cultivar | 1    | 0    | 0 | H4H5 |

|          |         |        |                           |      |      |   |                                 |
|----------|---------|--------|---------------------------|------|------|---|---------------------------------|
| FR11T028 | Rainier | Regina | Landrace or bred cultivar | 1    | 0    | 0 | H4H5                            |
| FR11T029 | Rainier | Regina | Landrace or bred cultivar | 1    | 0    | 0 | H4H4                            |
| FR11T030 | Rainier | Regina | Landrace or bred cultivar | 1    | 0    | 0 | H4H4                            |
| FR11T031 | Rainier | Regina | Landrace or bred cultivar | 1    | 0    | 0 | H4H4                            |
| FR11T032 | Rainier | Regina | Landrace or bred cultivar | 1    | 0    | 0 | H4H5                            |
| FR12T001 | Lapins  | Moreau | Landrace or bred cultivar | 0.49 | 0.51 | 0 | Recombination within QTL region |
| FR12T003 | Lapins  | Moreau | Landrace or bred cultivar | 1    | 0    | 0 | H1H1                            |
| FR12T004 | Lapins  | Moreau | Landrace or bred cultivar | 1    | 0    | 0 | H1H4                            |
| FR12T006 | Lapins  | Moreau | Landrace or bred cultivar | 0    | 1    | 0 | H1H2                            |
| FR12T009 | Lapins  | Moreau | Landrace or bred cultivar | 1    | 0    | 0 | H1H4                            |
| FR12T011 | Lapins  | Moreau | Landrace or bred cultivar | 1    | 0    | 0 | H1H1                            |
| FR12T012 | Lapins  | Moreau | Landrace or bred cultivar | 0    | 1    | 0 | H1H2                            |
| FR12T055 | Lapins  | Venus  | Landrace or bred cultivar | 1    | 0    | 0 | H1H4                            |
| FR12T056 | Lapins  | Venus  | Landrace or bred cultivar | 1    | 0    | 0 | H1H4                            |
| FR12T057 | Lapins  | Venus  | Landrace or bred cultivar | 1    | 0    | 0 | H1H1                            |
| FR12T058 | Lapins  | Venus  | Landrace or bred cultivar | 1    | 0    | 0 | H1H1                            |
| FR12T060 | Lapins  | Venus  | Landrace or bred cultivar | 1    | 0    | 0 | H4H4                            |
| FR12T063 | Lapins  | Venus  | Landrace or bred cultivar | 1    | 0    | 0 | H1H4                            |
| FR12T066 | Lapins  | Venus  | Landrace or bred cultivar | 1    | 0    | 0 | H4H4                            |
| FR12T067 | Lapins  | Venus  | Landrace or bred cultivar | 1    | 0    | 0 | H1H4                            |
| FR12T068 | Lapins  | Venus  | Landrace or bred cultivar | 1    | 0    | 0 | H1H4                            |
| FR12T069 | Lapins  | Venus  | Landrace or bred cultivar | 1    | 0    | 0 | H1H4                            |
| FR12T071 | Lapins  | Venus  | Landrace or bred cultivar | 1    | 0    | 0 | H1H4                            |
| FR12T072 | Lapins  | Venus  | Landrace or bred cultivar | 1    | 0    | 0 | H1H4                            |
| FR12T073 | Lapins  | Venus  | Landrace or bred cultivar | 1    | 0    | 0 | H1H4                            |
| FR12T074 | Lapins  | Venus  | Landrace or bred cultivar | 1    | 0    | 0 | H1H4                            |
| FR12T076 | Lapins  | Venus  | Landrace or bred cultivar | 1    | 0    | 0 | H1H1                            |
| FR12T077 | Selah   | Moreau | Landrace or bred cultivar | 1    | 0    | 0 | H1H4                            |
| FR12T078 | Lapins  | Venus  | Landrace or bred cultivar | 1    | 0    | 0 | H1H1                            |
| FR12T080 | Selah   | Venus  | Landrace or bred cultivar | 1    | 0    | 0 | H1H4                            |
| FR12T081 | Selah   | Venus  | Landrace or bred cultivar | 1    | 0    | 0 | H1H1                            |

|          |            |          |                           |      |      |   |      |
|----------|------------|----------|---------------------------|------|------|---|------|
| FR12T091 | Rainier    | Moreau   | Landrace or bred cultivar | 0    | 1    | 0 | H2H4 |
| FR12T093 | Rainier    | Moreau   | Landrace or bred cultivar | 0    | 1    | 0 | H2H4 |
| FR12T094 | Rainier    | Moreau   | Landrace or bred cultivar | 1    | 0    | 0 | H1H4 |
| FR13T004 | Sweetheart | BB       | Landrace or bred cultivar | 1    | 0    | 0 | H1H4 |
| FR13T058 | Selah      | Moreau   | Landrace or bred cultivar | 0    | 1    | 0 | H2H4 |
| FR13T060 | Selah      | Moreau   | Landrace or bred cultivar | 0    | 1    | 0 | H1H2 |
| FR13T061 | Selah      | Moreau   | Landrace or bred cultivar | 1    | 0    | 0 | H1H4 |
| FR13T071 | Selah      | *        | Landrace or bred cultivar | 0.98 | 0.02 | 0 | H4H4 |
| FR14T012 | Benton     | Selah    | Landrace or bred cultivar | 1    | 0    | 0 | H1H1 |
| FR14T056 | Cowiche    | Regina   | Landrace or bred cultivar | 1    | 0    | 0 | H4H4 |
| FR14T057 | Cowiche    | Regina   | Landrace or bred cultivar | 1    | 0    | 0 | H4H5 |
| FR14T060 | Cowiche    | Regina   | Landrace or bred cultivar | 1    | 0    | 0 | H4H5 |
| FR14T075 | Cowiche    | Regina   | Landrace or bred cultivar | 1    | 0    | 0 | H4H4 |
| FR14T076 | Cowiche    | Regina   | Landrace or bred cultivar | 1    | 0    | 0 | H4H5 |
| FR14T078 | Cowiche    | Regina   | Landrace or bred cultivar | 1    | 0    | 0 | H4H5 |
| FR14T079 | Cowiche    | Regina   | Landrace or bred cultivar | 1    | 0    | 0 | H4H4 |
| FR14T080 | Cowiche    | Regina   | Landrace or bred cultivar | 1    | 0    | 0 | H4H4 |
| FR14T081 | Cowiche    | Regina   | Landrace or bred cultivar | 1    | 0    | 0 | H4H5 |
| FR14T082 | Cowiche    | Regina   | Landrace or bred cultivar | 1    | 0    | 0 | H4H5 |
| FR14T084 | Cowiche    | Regina   | Landrace or bred cultivar | 1    | 0    | 0 | H4H4 |
| FR14T086 | Cowiche    | Regina   | Landrace or bred cultivar | 1    | 0    | 0 | H4H4 |
| FR14T100 | Cowiche    | Regina   | Landrace or bred cultivar | 1    | 0    | 0 | H4H5 |
| FR16T001 | Benton     | Ambrunes | Landrace or bred cultivar | 1    | 0    | 0 | H1H1 |
| FR16T012 | Kiona      | *        | Landrace or bred cultivar | 0.76 | 0.24 | 0 | H4H6 |
| FR16T024 | Kordia     | Van      | Landrace or bred cultivar | 1    | 0    | 0 | H2H4 |
| FR16T040 | Benton     | Benton   | Landrace or bred cultivar | 1    | 0    | 0 | H1H4 |
| FR16T041 | Bing       | Regina   | Landrace or bred cultivar | 0.97 | 0.03 | 0 | H4H4 |
| FR17T006 | Bing       | Regina   | Landrace or bred cultivar | 1    | 0    | 0 | H4H5 |
| FR17T051 | Cowiche    | Summit   | Landrace or bred cultivar | 1    | 0    | 0 | H4H4 |
| FR17T052 | Cowiche    | Summit   | Landrace or bred cultivar | 0.99 | 0.01 | 0 | H4H4 |
| FR17T053 | Cowiche    | Summit   | Landrace or bred cultivar | 1    | 0    | 0 | H4H4 |

|          |            |                |                           |      |      |   |                                 |
|----------|------------|----------------|---------------------------|------|------|---|---------------------------------|
| FR17T054 | Cowiche    | Summit         | Landrace or bred cultivar | 1    | 0    | 0 | H4H4                            |
| FR17T055 | Cowiche    | Summit         | Landrace or bred cultivar | 0.99 | 0.01 | 0 | H4H4                            |
| FR17T059 | Cowiche    | Summit         | Landrace or bred cultivar | 1    | 0    | 0 | H4H4                            |
| FR17T060 | Cowiche    | Summit         | Landrace or bred cultivar | 1    | 0    | 0 | H4H4                            |
| FR17T061 | Cowiche    | Summit         | Landrace or bred cultivar | 0.99 | 0.01 | 0 | H4H4                            |
| FR17T062 | Cowiche    | Summit         | Landrace or bred cultivar | 1    | 0    | 0 | H4H4                            |
| FR17T063 | Lapins     | Schneiders     | Landrace or bred cultivar | 0.75 | 0.25 | 0 | H4H7                            |
| FR17T066 | Bing       | Regina         | Landrace or bred cultivar | 0.97 | 0.03 | 0 | H4H5                            |
| FR17T073 | Benton     | Ambrunes       | Landrace or bred cultivar | 1    | 0    | 0 | H1H4                            |
| FR17T080 | Benton     | Ambrunes       | Landrace or bred cultivar | 1    | 0    | 0 | H1H4                            |
| FR17T082 | Benton     | Regina         | Landrace or bred cultivar | 1    | 0    | 0 | H4H5                            |
| FR18T017 | Kordia     | Bing           | Landrace or bred cultivar | 0.98 | 0.02 | 0 | H4H5                            |
| FR18T018 | Kordia     | Regina         | Landrace or bred cultivar | 1    | 0    | 0 | H5H5                            |
| FR18T019 | Kordia     | Bing           | Landrace or bred cultivar | 1    | 0    | 0 | H2H4                            |
| FR18T020 | Kordia     | Regina         | Landrace or bred cultivar | 1    | 0    | 0 | Recombination within QTL region |
| FR18T041 | Kordia     | Regina         | Landrace or bred cultivar | 1    | 0    | 0 | H2H5                            |
| FR18T042 | Kordia     | Regina         | Landrace or bred cultivar | 1    | 0    | 0 | H4H5                            |
| FR18T043 | Sweetheart | Krupnoplodnaya | Landrace or bred cultivar | 1    | 0    | 0 | H1H5                            |
| FR18T044 | Kordia     | Regina         | Landrace or bred cultivar | 1    | 0    | 0 | H2H4                            |
| FR18T045 | Kordia     | Bing           | Landrace or bred cultivar | 1    | 0    | 0 | H4H5                            |
| FR18T047 | Kordia     | Bing           | Landrace or bred cultivar | 1    | 0    | 0 | H2H4                            |
| FR18T048 | Kordia     | Bing           | Landrace or bred cultivar | 1    | 0    | 0 | H2H4                            |
| FR18T052 | Kordia     | Van            | Landrace or bred cultivar | 1    | 0    | 0 | H2H4                            |
| FR18T071 | Rainier    | Benton         | Landrace or bred cultivar | 1    | 0    | 0 | H1H4                            |
| FR18T073 | Rainier    | Benton         | Landrace or bred cultivar | 1    | 0    | 0 | H4H4                            |
| FR18T074 | Rainier    | Benton         | Landrace or bred cultivar | 1    | 0    | 0 | H4H4                            |
| FR18T076 | Rainier    | Benton         | Landrace or bred cultivar | 1    | 0    | 0 | H1H4                            |
| FR19T066 | Selah      | *              | Landrace or bred cultivar | 0.73 | 0.27 | 0 | H4H4                            |
| FR19T069 | Selah      | Krupnoplodnaya | Landrace or bred cultivar | 1    | 0    | 0 | H4H5                            |
| FR19T070 | Selah      | Krupnoplodnaya | Landrace or bred cultivar | 1    | 0    | 0 | H1H5                            |
| FR19T071 | Selah      | Krupnoplodnaya | Landrace or bred cultivar | 1    | 0    | 0 | H1H5                            |

|          |         |                |                           |   |   |   |      |
|----------|---------|----------------|---------------------------|---|---|---|------|
| FR19T072 | Selah   | Krupnoplodnaya | Landrace or bred cultivar | 1 | 0 | 0 | H4H4 |
| FR19T073 | Selah   | Selah          | Landrace or bred cultivar | 1 | 0 | 0 | H1H1 |
| FR19T075 | Selah   | Selah          | Landrace or bred cultivar | 1 | 0 | 0 | H1H1 |
| FR19T076 | Selah   | Krupnoplodnaya | Landrace or bred cultivar | 1 | 0 | 0 | H1H4 |
| FR19T078 | Selah   | Krupnoplodnaya | Landrace or bred cultivar | 1 | 0 | 0 | H4H5 |
| FR1T027  | Lapins  | Regina         | Landrace or bred cultivar | 1 | 0 | 0 | H4H5 |
| FR1T028  | Lapins  | Regina         | Landrace or bred cultivar | 1 | 0 | 0 | H1H4 |
| FR1T029  | Lapins  | Regina         | Landrace or bred cultivar | 1 | 0 | 0 | H1H5 |
| FR1T030  | Lapins  | Regina         | Landrace or bred cultivar | 1 | 0 | 0 | H1H4 |
| FR1T031  | Lapins  | Regina         | Landrace or bred cultivar | 1 | 0 | 0 | H1H5 |
| FR1T032  | Lapins  | Regina         | Landrace or bred cultivar | 1 | 0 | 0 | H1H4 |
| FR1T033  | Lapins  | Bing           | Landrace or bred cultivar | 1 | 0 | 0 | H1H4 |
| FR1T035  | Lapins  | Regina         | Landrace or bred cultivar | 1 | 0 | 0 | H4H4 |
| FR1T036  | Lapins  | Regina         | Landrace or bred cultivar | 1 | 0 | 0 | H1H4 |
| FR1T037  | Lapins  | Regina         | Landrace or bred cultivar | 1 | 0 | 0 | H4H4 |
| FR1T038  | Lapins  | Regina         | Landrace or bred cultivar | 1 | 0 | 0 | H1H5 |
| FR1T039  | Lapins  | Regina         | Landrace or bred cultivar | 1 | 0 | 0 | H1H4 |
| FR1T040  | Lapins  | Regina         | Landrace or bred cultivar | 1 | 0 | 0 | H1H5 |
| FR1T041  | Lapins  | Regina         | Landrace or bred cultivar | 1 | 0 | 0 | H4H4 |
| FR1T042  | Lapins  | Regina         | Landrace or bred cultivar | 1 | 0 | 0 | H4H5 |
| FR1T050  | Lapins  | Kordia         | Landrace or bred cultivar | 1 | 0 | 0 | H1H2 |
| FR1T054  | Lapins  | Regina         | Landrace or bred cultivar | 1 | 0 | 0 | H1H5 |
| FR1T056  | Lapins  | Regina         | Landrace or bred cultivar | 1 | 0 | 0 | H1H5 |
| FR1T065  | Lapins  | Regina         | Landrace or bred cultivar | 1 | 0 | 0 | H1H4 |
| FR1T066  | Lapins  | Regina         | Landrace or bred cultivar | 1 | 0 | 0 | H4H4 |
| FR1T068  | Lapins  | Regina         | Landrace or bred cultivar | 1 | 0 | 0 | H1H5 |
| FR1T069  | Lapins  | Regina         | Landrace or bred cultivar | 1 | 0 | 0 | H1H4 |
| FR1T070  | Lapins  | Regina         | Landrace or bred cultivar | 1 | 0 | 0 | H1H4 |
| FR1T073  | Lapins  | Regina         | Landrace or bred cultivar | 1 | 0 | 0 | H1H5 |
| FR1T074  | Lapins  | Regina         | Landrace or bred cultivar | 1 | 0 | 0 | H4H5 |
| FR20T045 | Cowiche | Regina         | Landrace or bred cultivar | 1 | 0 | 0 | H4H5 |



|          |         |                |                                          |      |      |   |                                 |
|----------|---------|----------------|------------------------------------------|------|------|---|---------------------------------|
| FR20T047 | Cowiche | Chelan         | Landrace or bred cultivar                | 1    | 0    | 0 | H1H4                            |
| FR21T003 | Selah   | Selah          | Landrace or bred cultivar                | 1    | 0    | 0 | H1H4                            |
| FR21T037 | Bing    | Regina         | Landrace or bred cultivar                | 0.97 | 0.03 | 0 | H4H5                            |
| FR21T040 | Bing    | Regina         | Landrace or bred cultivar                | 0.99 | 0.01 | 0 | H4H5                            |
| FR21T063 | Selah   | Krupnoplodnaya | Landrace or bred cultivar                | 1    | 0    | 0 | H1H4                            |
| FR22T001 | Cowiche | Bertiolle      | Landrace or bred cultivar                | 0.99 | 0.01 | 0 | H4H5                            |
| FR22T002 | Cowiche | Bertiolle      | Landrace or bred cultivar                | 0.99 | 0.01 | 0 | H4H5                            |
| FR22T003 | Cowiche | Rainier        | Landrace or bred cultivar                | 1    | 0    | 0 | H4H4                            |
| FR22T004 | Cowiche | Tieton         | Landrace or bred cultivar                | 1    | 0    | 0 | H4H4                            |
| FR22T005 | Cowiche | *              | Landrace or bred cultivar                | 0.93 | 0.07 | 0 | H4H4                            |
| FR22T006 | Cowiche | Chelan         | Landrace or bred cultivar                | 1    | 0    | 0 | H1H4                            |
| FR22T007 | Cowiche | Cristobalina   | Landrace or bred cultivar                | 1    | 0    | 0 | H1H4                            |
| FR23T010 | Benton  | Benton         | Landrace or bred cultivar                | 1    | 0    | 0 | H4H4                            |
| FR23T011 | Benton  | Benton         | Landrace or bred cultivar                | 1    | 0    | 0 | H1H4                            |
| FR23T065 | BB      | MIM 23         | Wild × Cultivar F <sub>1</sub> offspring | 0    | 1    | 0 | H4H12                           |
| FR23T067 | BB      | MIM 23         | Wild × Cultivar F <sub>1</sub> offspring | 0    | 1    | 0 | H4H12                           |
| FR23T068 | BB      | MIM 23         | Wild × Cultivar F <sub>1</sub> offspring | 0    | 1    | 0 | H4H8                            |
| FR23T069 | BB      | MIM 23         | Wild × Cultivar F <sub>1</sub> offspring | 0    | 1    | 0 | H4H12                           |
| FR23T070 | BB      | MIM 23         | Wild × Cultivar F <sub>1</sub> offspring | 0    | 1    | 0 | H4H12                           |
| FR23T072 | BB      | MIM 23         | Wild × Cultivar F <sub>1</sub> offspring | 0    | 1    | 0 | H4H11                           |
| FR23T073 | BB      | MIM 23         | Wild × Cultivar F <sub>1</sub> offspring | 0    | 1    | 0 | Recombination within QTL region |
| FR23T089 | BB      | MIM 17         | Wild × Cultivar F <sub>1</sub> offspring | 0    | 1    | 0 | H4H8                            |
| FR23T090 | BB      | MIM 17         | Wild × Cultivar F <sub>1</sub> offspring | 0    | 1    | 0 | H4H8                            |
| FR23T091 | BB      | MIM 17         | Wild × Cultivar F <sub>1</sub> offspring | 0    | 1    | 0 | H4H10                           |
| FR23T093 | BB      | MIM 17         | Wild × Cultivar F <sub>1</sub> offspring | 0    | 1    | 0 | H4H10                           |
| FR23T095 | BB      | MIM 17         | Wild × Cultivar F <sub>1</sub> offspring | 0    | 1    | 0 | H4H10                           |
| FR23T097 | BB      | MIM 17         | Wild × Cultivar F <sub>1</sub> offspring | 0    | 1    | 0 | H4H8                            |
| FR23T112 | Kiona   | Cristobalina   | Landrace or bred cultivar                | 0    | 1    | 0 | H6H9                            |
| FR23T113 | Kiona   | Cristobalina   | Landrace or bred cultivar                | 0    | 1    | 0 | H6H9                            |
| FR23T114 | Kiona   | Cristobalina   | Landrace or bred cultivar                | 0    | 1    | 0 | H6H9                            |
| FR23T115 | Kiona   | Cristobalina   | Landrace or bred cultivar                | 0.87 | 0.13 | 0 | H1H6                            |

|          |         |              |                           |      |      |   |      |
|----------|---------|--------------|---------------------------|------|------|---|------|
| FR23T116 | Kiona   | Cristobalina | Landrace or bred cultivar | 1    | 0    | 0 | H1H6 |
| FR23T119 | Kiona   | Cristobalina | Landrace or bred cultivar | 0    | 1    | 0 | H6H9 |
| FR23T120 | Kiona   | Cristobalina | Landrace or bred cultivar | 0    | 1    | 0 | H6H9 |
| FR23T123 | Kiona   | Cristobalina | Landrace or bred cultivar | 0    | 1    | 0 | H6H9 |
| FR23T124 | Kiona   | Cristobalina | Landrace or bred cultivar | 0.12 | 0.88 | 0 | H6H9 |
| FR23T127 | Cowiche | Vittoria     | Landrace or bred cultivar | 1    | 0    | 0 | H1H4 |
| FR23T128 | Cowiche | Index        | Landrace or bred cultivar | 1    | 0    | 0 | H1H4 |
| FR23T129 | Cowiche | Vittoria     | Landrace or bred cultivar | 1    | 0    | 0 | H1H4 |
| FR23T130 | Cowiche | Vittoria     | Landrace or bred cultivar | 1    | 0    | 0 | H1H4 |
| FR23T131 | Cowiche | Vittoria     | Landrace or bred cultivar | 1    | 0    | 0 | H1H4 |
| FR23T132 | Cowiche | *            | Landrace or bred cultivar | 0.75 | 0.25 | 0 | H4H4 |
| FR23T133 | Cowiche | *            | Landrace or bred cultivar | 0.8  | 0.2  | 0 | H4H4 |
| FR24T064 | Benton  | *            | Landrace or bred cultivar | 0.45 | 0.55 | 0 | H1H1 |
| FR24T066 | Benton  | Benton       | Landrace or bred cultivar | 1    | 0    | 0 | H1H4 |
| FR24T067 | Benton  | Benton       | Landrace or bred cultivar | 1    | 0    | 0 | H1H4 |
| FR24T068 | Benton  | Dzherlo      | Landrace or bred cultivar | 0.99 | 0.01 | 0 | H1H4 |
| FR24T069 | Benton  | Dzherlo      | Landrace or bred cultivar | 0.76 | 0.24 | 0 | H1H4 |
| FR24T070 | Benton  | *            | Landrace or bred cultivar | 0.77 | 0.23 | 0 | H1H7 |
| FR24T071 | Benton  | Dzherlo      | Landrace or bred cultivar | 1    | 0    | 0 | H1H4 |
| FR24T072 | Benton  | Dzherlo      | Landrace or bred cultivar | 0.76 | 0.24 | 0 | H4H4 |
| FR24T073 | Benton  | *            | Landrace or bred cultivar | 0.73 | 0.27 | 0 | H4H4 |
| FR24T077 | Benton  | Dzherlo      | Landrace or bred cultivar | 1    | 0    | 0 | H1H4 |
| FR25T081 | Benton  | Vittoria     | Landrace or bred cultivar | 1    | 0    | 0 | H1H1 |
| FR25T084 | Benton  | Vittoria     | Landrace or bred cultivar | 1    | 0    | 0 | H1H4 |
| FR25T085 | Benton  | Benton       | Landrace or bred cultivar | 1    | 0    | 0 | H4H4 |
| FR25T086 | Benton  | Vittoria     | Landrace or bred cultivar | 0.98 | 0.02 | 0 | H1H1 |
| FR25T090 | Benton  | Vittoria     | Landrace or bred cultivar | 1    | 0    | 0 | H1H1 |
| FR25T092 | Benton  | Benton       | Landrace or bred cultivar | 1    | 0    | 0 | H4H4 |
| FR25T093 | Benton  | Vittoria     | Landrace or bred cultivar | 1    | 0    | 0 | H1H1 |
| FR25T097 | Benton  | *            | Landrace or bred cultivar | 0.75 | 0.25 | 0 | H4H4 |
| FR25T098 | Benton  | *            | Landrace or bred cultivar | 0.76 | 0.24 | 0 | H1H4 |

|          |      |           |                                          |      |      |      |                                 |
|----------|------|-----------|------------------------------------------|------|------|------|---------------------------------|
| FR26T028 | Bing | *         | Landrace or bred cultivar                | 0.74 | 0.25 | 0.01 | H1H4                            |
| FR26T030 | Bing | Bertiolle | Landrace or bred cultivar                | 0.94 | 0.06 | 0    | H4H5                            |
| FR26T031 | Bing | Bertiolle | Landrace or bred cultivar                | 0.96 | 0.04 | 0    | H4H5                            |
| FR26T033 | Bing | Bertiolle | Landrace or bred cultivar                | 0.99 | 0.01 | 0    | H4H5                            |
| FR26T034 | Bing | Bertiolle | Landrace or bred cultivar                | 0.98 | 0.02 | 0    | H4H5                            |
| FR26T036 | Bing | Bertiolle | Landrace or bred cultivar                | 0.98 | 0.02 | 0    | H4H5                            |
| FR26T037 | Bing | Bertiolle | Landrace or bred cultivar                | 0.96 | 0.04 | 0    | H4H5                            |
| FR26T038 | Bing | Bertiolle | Landrace or bred cultivar                | 0.96 | 0.04 | 0    | H4H5                            |
| FR26T040 | Bing | Selah     | Landrace or bred cultivar                | 1    | 0    | 0    | H4H4                            |
| FR26T117 | Bing | Lapins    | Landrace or bred cultivar                | 0.97 | 0.03 | 0    | H1H4                            |
| FR27T001 | DD   | MIM 23    | Wild × Cultivar F <sub>1</sub> offspring | 0    | 1    | 0    | H4H11                           |
| FR27T002 | DD   | MIM 23    | Wild × Cultivar F <sub>1</sub> offspring | 0    | 1    | 0    | H4H11                           |
| FR27T003 | DD   | MIM 23    | Wild × Cultivar F <sub>1</sub> offspring | 0    | 1    | 0    | H4H11                           |
| FR27T006 | DD   | MIM 17    | Wild × Cultivar F <sub>1</sub> offspring | 0    | 1    | 0    | H4H10                           |
| FR27T007 | DD   | MIM 17    | Wild × Cultivar F <sub>1</sub> offspring | 0    | 1    | 0    | H4H8                            |
| FR27T008 | DD   | MIM 17    | Wild × Cultivar F <sub>1</sub> offspring | 0    | 1    | 0    | H4H10                           |
| FR27T009 | DD   | MIM 17    | Wild × Cultivar F <sub>1</sub> offspring | 0    | 1    | 0    | H4H9                            |
| FR27T010 | DD   | MIM 17    | Wild × Cultivar F <sub>1</sub> offspring | 0    | 1    | 0    | H4H8                            |
| FR27T012 | DD   | MIM 17    | Wild × Cultivar F <sub>1</sub> offspring | 0    | 1    | 0    | Recombination within QTL region |
| FR27T013 | DD   | MIM 17    | Wild × Cultivar F <sub>1</sub> offspring | 0    | 1    | 0    | H4H8                            |
| FR27T014 | DD   | MIM 17    | Wild × Cultivar F <sub>1</sub> offspring | 0    | 1    | 0    | H4H10                           |
| FR27T015 | DD   | MIM 17    | Wild × Cultivar F <sub>1</sub> offspring | 0    | 1    | 0    | H4H8                            |
| FR27T016 | DD   | MIM 17    | Wild × Cultivar F <sub>1</sub> offspring | 0    | 1    | 0    | H4H10                           |
| FR27T017 | DD   | MIM 17    | Wild × Cultivar F <sub>1</sub> offspring | 0    | 1    | 0    | H4H8                            |
| FR27T018 | DD   | MIM 17    | Wild × Cultivar F <sub>1</sub> offspring | 0    | 1    | 0    | H4H10                           |
| FR27T050 | CC   | Venus     | Landrace or bred cultivar                | 1    | 0    | 0    | H1H4                            |
| FR27T051 | CC   | Bing      | Landrace or bred cultivar                | 0.97 | 0.03 | 0    | H4H4                            |
| FR27T052 | CC   | Venus     | Landrace or bred cultivar                | 1    | 0    | 0    | H1H4                            |
| FR27T053 | CC   | MIM 23    | Wild × Cultivar F <sub>1</sub> offspring | 0    | 1    | 0    | H4H12                           |
| FR27T054 | CC   | MIM 23    | Wild × Cultivar F <sub>1</sub> offspring | 0    | 1    | 0    | H4H11                           |
| FR27T094 | CC   | MIM 17    | Wild × Cultivar F <sub>1</sub> offspring | 0    | 1    | 0    | H4H8                            |

|          |    |        |                                          |   |   |   |                                 |
|----------|----|--------|------------------------------------------|---|---|---|---------------------------------|
| FR27T096 | CC | MIM 17 | Wild × Cultivar F <sub>1</sub> offspring | 0 | 1 | 0 | H4H10                           |
| FR27T097 | CC | MIM 17 | Wild × Cultivar F <sub>1</sub> offspring | 0 | 1 | 0 | H4H8                            |
| FR27T098 | CC | MIM 17 | Wild × Cultivar F <sub>1</sub> offspring | 0 | 1 | 0 | Recombination within QTL region |
| FR27T099 | CC | MIM 17 | Wild × Cultivar F <sub>1</sub> offspring | 0 | 1 | 0 | H4H10                           |
| FR27T100 | CC | MIM 17 | Wild × Cultivar F <sub>1</sub> offspring | 0 | 1 | 0 | H4H8                            |
| FR27T101 | CC | MIM 17 | Wild × Cultivar F <sub>1</sub> offspring | 0 | 1 | 0 | H4H8                            |
| FR27T102 | CC | MIM 17 | Wild × Cultivar F <sub>1</sub> offspring | 0 | 1 | 0 | H4H8                            |
| FR28T001 | DD | MIM 23 | Wild × Cultivar F <sub>1</sub> offspring | 0 | 1 | 0 | H4H12                           |
| FR28T002 | DD | MIM 23 | Wild × Cultivar F <sub>1</sub> offspring | 0 | 1 | 0 | H4H11                           |
| FR28T099 | EE | MIM 17 | Wild × Cultivar F <sub>1</sub> offspring | 0 | 1 | 0 | H4H8                            |
| FR28T100 | EE | MIM 17 | Wild × Cultivar F <sub>1</sub> offspring | 0 | 1 | 0 | H4H8                            |
| FR28T101 | EE | MIM 17 | Wild × Cultivar F <sub>1</sub> offspring | 0 | 1 | 0 | H4H8                            |
| FR28T102 | EE | MIM 17 | Wild × Cultivar F <sub>1</sub> offspring | 0 | 1 | 0 | H4H8                            |
| FR28T104 | EE | MIM 17 | Wild × Cultivar F <sub>1</sub> offspring | 0 | 1 | 0 | H4H10                           |
| FR28T105 | EE | MIM 17 | Wild × Cultivar F <sub>1</sub> offspring | 0 | 1 | 0 | H4H10                           |
| FR28T106 | EE | MIM 17 | Wild × Cultivar F <sub>1</sub> offspring | 0 | 1 | 0 | H4H8                            |
| FR28T107 | EE | MIM 17 | Wild × Cultivar F <sub>1</sub> offspring | 0 | 1 | 0 | H4H10                           |
| FR28T108 | EE | MIM 17 | Wild × Cultivar F <sub>1</sub> offspring | 0 | 1 | 0 | H4H10                           |
| FR29T073 | GG | MIM 23 | Wild × Cultivar F <sub>1</sub> offspring | 0 | 1 | 0 | H4H11                           |
| FR29T074 | GG | MIM 17 | Wild × Cultivar F <sub>1</sub> offspring | 0 | 1 | 0 | H4H10                           |
| FR29T075 | GG | MIM 17 | Wild × Cultivar F <sub>1</sub> offspring | 0 | 1 | 0 | H4H10                           |
| FR29T076 | GG | MIM 17 | Wild × Cultivar F <sub>1</sub> offspring | 0 | 1 | 0 | H4H10                           |
| FR29T077 | GG | MIM 17 | Wild × Cultivar F <sub>1</sub> offspring | 0 | 1 | 0 | H4H8                            |
| FR29T115 | EE | MIM 23 | Wild × Cultivar F <sub>1</sub> offspring | 0 | 1 | 0 | H4H12                           |
| FR29T117 | EE | MIM 23 | Wild × Cultivar F <sub>1</sub> offspring | 0 | 1 | 0 | H4H12                           |
| FR29T118 | EE | MIM 23 | Wild × Cultivar F <sub>1</sub> offspring | 0 | 1 | 0 | H4H11                           |
| FR29T119 | EE | MIM 23 | Wild × Cultivar F <sub>1</sub> offspring | 0 | 1 | 0 | H4H11                           |
| FR29T120 | EE | MIM 23 | Wild × Cultivar F <sub>1</sub> offspring | 0 | 1 | 0 | H4H11                           |
| FR29T122 | EE | MIM 23 | Wild × Cultivar F <sub>1</sub> offspring | 0 | 1 | 0 | H4H12                           |
| FR29T124 | EE | MIM 23 | Wild × Cultivar F <sub>1</sub> offspring | 0 | 1 | 0 | H4H12                           |
| FR29T125 | EE | MIM 23 | Wild × Cultivar F <sub>1</sub> offspring | 0 | 1 | 0 | H4H12                           |

|          |         |            |                                          |      |      |   |       |
|----------|---------|------------|------------------------------------------|------|------|---|-------|
| FR29T126 | EE      | MIM 23     | Wild × Cultivar F <sub>1</sub> offspring | 0    | 1    | 0 | H4H11 |
| FR2T024  | Selah   | Sunburst   | Landrace or bred cultivar                | 0.98 | 0.02 | 0 | H4H4  |
| FR2T030  | Rainier | Sweetheart | Landrace or bred cultivar                | 1    | 0    | 0 | H1H4  |
| FR2T035  | Lapins  | Ambrunes   | Landrace or bred cultivar                | 1    | 0    | 0 | H1H4  |
| FR2T037  | Lapins  | Ambrunes   | Landrace or bred cultivar                | 1    | 0    | 0 | H1H4  |
| FR2T038  | Lapins  | Ambrunes   | Landrace or bred cultivar                | 1    | 0    | 0 | H1H1  |
| FR2T040  | Lapins  | Ambrunes   | Landrace or bred cultivar                | 1    | 0    | 0 | H1H1  |
| FR2T045  | Lapins  | Ambrunes   | Landrace or bred cultivar                | 1    | 0    | 0 | H1H4  |
| FR2T046  | Lapins  | Ambrunes   | Landrace or bred cultivar                | 1    | 0    | 0 | H1H7  |
| FR2T048  | Lapins  | Ambrunes   | Landrace or bred cultivar                | 1    | 0    | 0 | H1H4  |
| FR2T049  | Lapins  | Ambrunes   | Landrace or bred cultivar                | 1    | 0    | 0 | H1H4  |
| FR2T050  | Lapins  | Ambrunes   | Landrace or bred cultivar                | 1    | 0    | 0 | H1H1  |
| FR2T054  | Lapins  | Ambrunes   | Landrace or bred cultivar                | 1    | 0    | 0 | H1H4  |
| FR2T057  | Lapins  | Ambrunes   | Landrace or bred cultivar                | 1    | 0    | 0 | H1H1  |
| FR2T058  | Lapins  | Ambrunes   | Landrace or bred cultivar                | 1    | 0    | 0 | H1H1  |
| FR2T062  | Lapins  | Ambrunes   | Landrace or bred cultivar                | 1    | 0    | 0 | H1H1  |
| FR2T063  | Lapins  | Ambrunes   | Landrace or bred cultivar                | 1    | 0    | 0 | H1H1  |
| FR2T079  | Lapins  | Ambrunes   | Landrace or bred cultivar                | 1    | 0    | 0 | H1H4  |
| FR2T080  | Lapins  | Ambrunes   | Landrace or bred cultivar                | 1    | 0    | 0 | H1H4  |
| FR30T099 | Lapins  | Vittoria   | Landrace or bred cultivar                | 1    | 0    | 0 | H1H1  |
| FR30T100 | Lapins  | Vittoria   | Landrace or bred cultivar                | 0.9  | 0.1  | 0 | H1H1  |
| FR30T101 | Lapins  | Vittoria   | Landrace or bred cultivar                | 0.97 | 0.03 | 0 | H1H4  |
| FR30T102 | Lapins  | Vittoria   | Landrace or bred cultivar                | 1    | 0    | 0 | H1H1  |
| FR30T103 | Lapins  | Vittoria   | Landrace or bred cultivar                | 0.97 | 0.03 | 0 | H1H4  |
| FR30T105 | Lapins  | Vittoria   | Landrace or bred cultivar                | 1    | 0    | 0 | H1H7  |
| FR30T106 | Lapins  | Vittoria   | Landrace or bred cultivar                | 1    | 0    | 0 | H1H4  |
| FR30T107 | Lapins  | Vittoria   | Landrace or bred cultivar                | 1    | 0    | 0 | H1H4  |
| FR30T108 | Lapins  | Vittoria   | Landrace or bred cultivar                | 1    | 0    | 0 | H1H1  |
| FR30T109 | Lapins  | Vittoria   | Landrace or bred cultivar                | 1    | 0    | 0 | H1H1  |
| FR31T007 | Rainier | Ambrunes   | Landrace or bred cultivar                | 1    | 0    | 0 | H1H4  |
| FR31T008 | Rainier | Ambrunes   | Landrace or bred cultivar                | 1    | 0    | 0 | H1H4  |

|          |         |              |                           |      |      |   |      |
|----------|---------|--------------|---------------------------|------|------|---|------|
| FR31T009 | Rainier | Ambrunes     | Landrace or bred cultivar | 1    | 0    | 0 | H1H4 |
| FR31T010 | Rainier | Dzherlo      | Landrace or bred cultivar | 1    | 0    | 0 | H1H4 |
| FR31T011 | Rainier | Ambrunes     | Landrace or bred cultivar | 1    | 0    | 0 | H1H4 |
| FR31T012 | Rainier | Ambrunes     | Landrace or bred cultivar | 1    | 0    | 0 | H1H4 |
| FR31T013 | Rainier | Ambrunes     | Landrace or bred cultivar | 1    | 0    | 0 | H1H4 |
| FR31T014 | Rainier | Dzherlo      | Landrace or bred cultivar | 1    | 0    | 0 | H1H4 |
| FR31T016 | Rainier | Ambrunes     | Landrace or bred cultivar | 1    | 0    | 0 | H1H4 |
| FR31T121 | Lapins  | Vittoria     | Landrace or bred cultivar | 1    | 0    | 0 | H1H1 |
| FR32T087 | Rainier | Bertiolle    | Landrace or bred cultivar | 0.99 | 0.01 | 0 | H4H5 |
| FR32T088 | Rainier | Bertiolle    | Landrace or bred cultivar | 0.99 | 0.01 | 0 | H4H5 |
| FR32T093 | Rainier | Bertiolle    | Landrace or bred cultivar | 0.98 | 0.02 | 0 | H4H5 |
| FR33T001 | Rainier | Cristobalina | Landrace or bred cultivar | 1    | 0    | 0 | H1H4 |
| FR33T003 | Rainier | Cristobalina | Landrace or bred cultivar | 0.98 | 0.02 | 0 | H1H4 |
| FR33T004 | Rainier | Cristobalina | Landrace or bred cultivar | 1    | 0    | 0 | H1H4 |
| FR33T005 | Rainier | Cristobalina | Landrace or bred cultivar | 0.95 | 0.05 | 0 | H1H4 |
| FR33T006 | Rainier | Cristobalina | Landrace or bred cultivar | 0.92 | 0.08 | 0 | H1H4 |
| FR33T007 | Rainier | Cristobalina | Landrace or bred cultivar | 0    | 1    | 0 | H4H9 |
| FR33T008 | Rainier | Cristobalina | Landrace or bred cultivar | 0    | 1    | 0 | H4H9 |
| FR33T011 | Rainier | Cristobalina | Landrace or bred cultivar | 0.63 | 0.37 | 0 | H4H5 |
| FR35T101 | Rainier | Dzherlo      | Landrace or bred cultivar | 1    | 0    | 0 | H1H4 |
| FR35T102 | Rainier | Dzherlo      | Landrace or bred cultivar | 1    | 0    | 0 | H1H4 |
| FR35T103 | Rainier | Chelan       | Landrace or bred cultivar | 1    | 0    | 0 | H1H4 |
| FR35T104 | Rainier | Dzherlo      | Landrace or bred cultivar | 0.91 | 0.09 | 0 | H4H5 |
| FR35T105 | Rainier | Dzherlo      | Landrace or bred cultivar | 0.76 | 0.24 | 0 | H4H4 |
| FR35T106 | Rainier | Dzherlo      | Landrace or bred cultivar | 1    | 0    | 0 | H1H4 |
| FR35T107 | Rainier | Dzherlo      | Landrace or bred cultivar | 1    | 0    | 0 | H1H4 |
| FR35T108 | Rainier | Ambrunes     | Landrace or bred cultivar | 1    | 0    | 0 | H1H4 |
| FR35T110 | Rainier | Dzherlo      | Landrace or bred cultivar | 1    | 0    | 0 | H1H4 |
| FR38T001 | Rainier | Sunburst     | Landrace or bred cultivar | 0.99 | 0.01 | 0 | H4H4 |
| FR38T002 | Rainier | Sunburst     | Landrace or bred cultivar | 0.99 | 0.01 | 0 | H4H4 |
| FR38T003 | Rainier | Sunburst     | Landrace or bred cultivar | 0.98 | 0.02 | 0 | H4H4 |

|          |         |          |                           |      |      |   |      |
|----------|---------|----------|---------------------------|------|------|---|------|
| FR38T005 | Rainier | Sunburst | Landrace or bred cultivar | 0.99 | 0.01 | 0 | H4H4 |
| FR38T006 | Rainier | Sunburst | Landrace or bred cultivar | 0.98 | 0.02 | 0 | H4H4 |
| FR3T002  | Lapins  | Ambrunes | Landrace or bred cultivar | 1    | 0    | 0 | H1H1 |
| FR3T003  | Lapins  | Ambrunes | Landrace or bred cultivar | 1    | 0    | 0 | H1H4 |
| FR3T004  | Lapins  | Ambrunes | Landrace or bred cultivar | 1    | 0    | 0 | H1H1 |
| FR3T005  | Lapins  | Lapins   | Landrace or bred cultivar | 1    | 0    | 0 | H1H1 |
| FR3T007  | Lapins  | Ambrunes | Landrace or bred cultivar | 1    | 0    | 0 | H1H1 |
| FR3T008  | Lapins  | Ambrunes | Landrace or bred cultivar | 1    | 0    | 0 | H1H4 |
| FR3T009  | Kordia  | Van      | Landrace or bred cultivar | 1    | 0    | 0 | H1H5 |
| FR3T011  | Kordia  | Regina   | Landrace or bred cultivar | 1    | 0    | 0 | H2H4 |
| FR3T012  | Kordia  | Bing     | Landrace or bred cultivar | 0.97 | 0.03 | 0 | H2H4 |
| FR3T013  | Kordia  | Regina   | Landrace or bred cultivar | 1    | 0    | 0 | H2H5 |
| FR3T014  | Kordia  | Regina   | Landrace or bred cultivar | 1    | 0    | 0 | H5H5 |
| FR3T015  | Kordia  | Regina   | Landrace or bred cultivar | 1    | 0    | 0 | H4H5 |
| FR3T016  | Kordia  | Lapins   | Landrace or bred cultivar | 1    | 0    | 0 | H4H5 |
| FR3T017  | Kordia  | Bing     | Landrace or bred cultivar | 0.97 | 0.03 | 0 | H2H4 |
| FR3T018  | Lapins  | Tieton   | Landrace or bred cultivar | 1    | 0    | 0 | H1H6 |
| FR3T019  | Lapins  | Tieton   | Landrace or bred cultivar | 1    | 0    | 0 | H1H6 |
| FR3T020  | Lapins  | Tieton   | Landrace or bred cultivar | 1    | 0    | 0 | H1H6 |
| FR3T021  | Lapins  | Tieton   | Landrace or bred cultivar | 1    | 0    | 0 | H1H6 |
| FR3T022  | Lapins  | Regina   | Landrace or bred cultivar | 1    | 0    | 0 | H4H5 |
| FR3T023  | Lapins  | Tieton   | Landrace or bred cultivar | 1    | 0    | 0 | H4H6 |
| FR3T025  | Lapins  | Tieton   | Landrace or bred cultivar | 1    | 0    | 0 | H1H4 |
| FR3T026  | Lapins  | Tieton   | Landrace or bred cultivar | 1    | 0    | 0 | H4H6 |
| FR3T027  | Lapins  | Tieton   | Landrace or bred cultivar | 1    | 0    | 0 | H5H6 |
| FR3T028  | Lapins  | Tieton   | Landrace or bred cultivar | 1    | 0    | 0 | H4H4 |
| FR3T029  | Lapins  | Chelan   | Landrace or bred cultivar | 1    | 0    | 0 | H1H1 |
| FR3T030  | Lapins  | Chelan   | Landrace or bred cultivar | 1    | 0    | 0 | H1H4 |
| FR3T031  | Lapins  | Chelan   | Landrace or bred cultivar | 1    | 0    | 0 | H1H1 |
| FR3T032  | Lapins  | Chelan   | Landrace or bred cultivar | 1    | 0    | 0 | H1H1 |
| FR3T033  | Lapins  | Chelan   | Landrace or bred cultivar | 1    | 0    | 0 | H1H4 |

|          |            |           |                           |      |      |   |      |
|----------|------------|-----------|---------------------------|------|------|---|------|
| FR3T034  | Lapins     | Chelan    | Landrace or bred cultivar | 1    | 0    | 0 | H1H1 |
| FR3T043  | Lapins     | Lapins    | Landrace or bred cultivar | 1    | 0    | 0 | H1H1 |
| FR3T044  | Lapins     | Chelan    | Landrace or bred cultivar | 1    | 0    | 0 | H1H4 |
| FR3T046  | Lapins     | Chelan    | Landrace or bred cultivar | 1    | 0    | 0 | H1H1 |
| FR3T047  | Lapins     | Chelan    | Landrace or bred cultivar | 1    | 0    | 0 | H1H4 |
| FR3T050  | Lapins     | Chelan    | Landrace or bred cultivar | 1    | 0    | 0 | H1H1 |
| FR3T056  | Lapins     | Chelan    | Landrace or bred cultivar | 1    | 0    | 0 | H1H1 |
| FR3T057  | Lapins     | Chelan    | Landrace or bred cultivar | 1    | 0    | 0 | H1H4 |
| FR3T058  | Lapins     | Bing      | Landrace or bred cultivar | 0.97 | 0.03 | 0 | H4H4 |
| FR3T070  | Selah      | Ambrunes  | Landrace or bred cultivar | 1    | 0    | 0 | H1H4 |
| FR42T001 | Selah      | Bertiolle | Landrace or bred cultivar | 0.98 | 0.02 | 0 | H4H5 |
| FR42T003 | Selah      | Bertiolle | Landrace or bred cultivar | 0.98 | 0.02 | 0 | H4H5 |
| FR42T005 | Selah      | Bertiolle | Landrace or bred cultivar | 0.99 | 0.01 | 0 | H1H5 |
| FR42T006 | Selah      | *         | Landrace or bred cultivar | 0.74 | 0.26 | 0 | H1H4 |
| FR42T007 | Selah      | Benton    | Landrace or bred cultivar | 1    | 0    | 0 | H1H4 |
| FR42T008 | Selah      | *         | Landrace or bred cultivar | 0.74 | 0.26 | 0 | H4H5 |
| FR42T009 | Selah      | *         | Landrace or bred cultivar | 0.95 | 0.05 | 0 | H4H4 |
| FR42T011 | Selah      | Selah     | Landrace or bred cultivar | 1    | 0    | 0 | H1H4 |
| FR42T012 | Selah      | *         | Landrace or bred cultivar | 0.75 | 0.25 | 0 | H1H4 |
| FR42T042 | Selah      | *         | Landrace or bred cultivar | 1    | 0    | 0 | H1H4 |
| FR42T045 | Selah      | Selah     | Landrace or bred cultivar | 1    | 0    | 0 | H4H4 |
| FR42T047 | Bing       | Selah     | Landrace or bred cultivar | 0.97 | 0.03 | 0 | H4H4 |
| FR42T048 | Selah      | Selah     | Landrace or bred cultivar | 1    | 0    | 0 | H1H1 |
| FR42T049 | Benton     | Selah     | Landrace or bred cultivar | 1    | 0    | 0 | H1H4 |
| FR42T050 | Benton     | Selah     | Landrace or bred cultivar | 1    | 0    | 0 | H1H4 |
| FR47T058 | Selah      | Vittoria  | Landrace or bred cultivar | 1    | 0    | 0 | H1H4 |
| FR47T059 | Selah      | Vittoria  | Landrace or bred cultivar | 1    | 0    | 0 | H1H1 |
| FR49T083 | Sweetheart | Regina    | Landrace or bred cultivar | 1    | 0    | 0 | H1H5 |
| FR4T029  | Selah      | *         | Landrace or bred cultivar | 1    | 0    | 0 | H4H4 |
| FR5T019  | Kordia     | Van       | Landrace or bred cultivar | 1    | 0    | 0 | H1H5 |
| FR5T021  | Kordia     | Van       | Landrace or bred cultivar | 1    | 0    | 0 | H1H5 |



|         |            |                |                           |      |      |   |      |
|---------|------------|----------------|---------------------------|------|------|---|------|
| FR5T025 | Kordia     | Lapins         | Landrace or bred cultivar | 1    | 0    | 0 | H2H4 |
| FR6T097 | Sweetheart | CC             | Landrace or bred cultivar | 1    | 0    | 0 | H1H4 |
| FR7T026 | Sweetheart | CC             | Landrace or bred cultivar | 1    | 0    | 0 | H1H4 |
| FR8T002 | PMR-1      | Moreau         | Landrace or bred cultivar | 0.21 | 0.79 | 0 | H2H4 |
| FR8T003 | PMR-1      | Moreau         | Landrace or bred cultivar | 1    | 0    | 0 | H1H4 |
| FR8T004 | PMR-1      | Moreau         | Landrace or bred cultivar | 0    | 1    | 0 | H2H4 |
| FR8T005 | PMR-1      | Moreau         | Landrace or bred cultivar | 0    | 1    | 0 | H2H4 |
| FR8T006 | PMR-1      | Moreau         | Landrace or bred cultivar | 1    | 0    | 0 | H1H4 |
| FR8T007 | PMR-1      | Moreau         | Landrace or bred cultivar | 1    | 0    | 0 | H1H4 |
| FR8T009 | Cowiche    | *              | Landrace or bred cultivar | 0.73 | 0.27 | 0 | H4H4 |
| FR8T010 | PMR-1      | Venus          | Landrace or bred cultivar | 1    | 0    | 0 | H4H4 |
| FR8T011 | PMR-1      | Venus          | Landrace or bred cultivar | 1    | 0    | 0 | H1H4 |
| FR8T012 | PMR-1      | Venus          | Landrace or bred cultivar | 1    | 0    | 0 | H1H4 |
| FR8T047 | Sweetheart | Krupnoplodnaya | Landrace or bred cultivar | 1    | 0    | 0 | H1H5 |
| FR8T050 | Lapins     | *              | Landrace or bred cultivar | 0.77 | 0.23 | 0 | H1H4 |
| FR8T053 | Selah      | Sunburst       | Landrace or bred cultivar | 0.99 | 0.01 | 0 | H1H4 |
| FR8T056 | Selah      | Selah          | Landrace or bred cultivar | 1    | 0    | 0 | H1H1 |
| FR8T057 | Selah      | Sunburst       | Landrace or bred cultivar | 0.99 | 0.01 | 0 | H4H4 |
| FR8T074 | GG         | *              | Landrace or bred cultivar | 0.98 | 0.02 | 0 | H4H4 |
| FR9T031 | Lapins     | Krupnoplodnaya | Landrace or bred cultivar | 1    | 0    | 0 | H4H5 |
| FR9T032 | Lapins     | Krupnoplodnaya | Landrace or bred cultivar | 1    | 0    | 0 | H4H7 |
| FR9T033 | Sweetheart | Moreau         | Landrace or bred cultivar | 0    | 1    | 0 | H1H2 |
| FR9T034 | Sweetheart | Moreau         | Landrace or bred cultivar | 0    | 1    | 0 | H1H2 |
| FR9T037 | DD         | Lapins         | Landrace or bred cultivar | 1    | 0    | 0 | H4H4 |
| FR9T081 | Kiona      | Chelan         | Landrace or bred cultivar | 1    | 0    | 0 | H1H6 |
| FR9T083 | Kiona      | Chelan         | Landrace or bred cultivar | 1    | 0    | 0 | H1H6 |
| FR9T084 | Kiona      | Chelan         | Landrace or bred cultivar | 1    | 0    | 0 | H1H6 |
| FR9T085 | Kiona      | Chelan         | Landrace or bred cultivar | 1    | 0    | 0 | H1H6 |
| FR9T086 | Kiona      | Chelan         | Landrace or bred cultivar | 1    | 0    | 0 | H1H6 |
| FR9T087 | Kiona      | Chelan         | Landrace or bred cultivar | 1    | 0    | 0 | H1H6 |
| FR9T089 | Kiona      | Chelan         | Landrace or bred cultivar | 1    | 0    | 0 | H1H6 |

|         |       |        |                           |   |   |   |      |
|---------|-------|--------|---------------------------|---|---|---|------|
| FR9T095 | Kiona | *      | Landrace or bred cultivar | 1 | 0 | 0 | H4H6 |
| FR9T096 | Kiona | Chelan | Landrace or bred cultivar | 1 | 0 | 0 | H1H6 |
| FR9T097 | Kiona | Chelan | Landrace or bred cultivar | 1 | 0 | 0 | H1H6 |
| FR9T098 | Kiona | Chelan | Landrace or bred cultivar | 1 | 0 | 0 | H1H6 |

---

**Table S3.** Frequencies and founder contributions for *qP-FF4.1* haplotypes in RosBREED sweet cherry germplasm and for eight sour cherry cultivars. 'Fercer' and 'X' are highlighted in red.

| <b>Haplotype</b> | <b>Frequency in sweet cherry germplasm (%)</b> | <b>Founder germplasm contributor(s)</b>                                                                                                               |
|------------------|------------------------------------------------|-------------------------------------------------------------------------------------------------------------------------------------------------------|
| H1               | 28.2                                           | EmperorFrancis, Napoleon, Moreau, Ambrunés, BlackRepublican, Windsor, Schmidt, Cristobalina, Dzherlo, SatoNishiki, Vittoria, <b>Fercer</b> , <b>X</b> |
| H2               | 1.8                                            | Moreau, Kordia, <b>Fercer</b>                                                                                                                         |
| H3               | 0.9                                            | EarlyBurlat, <b>X</b>                                                                                                                                 |
| H4               | 49.1                                           | Napoleon, Lambert, BlackRepublican, Windsor, Cowiche, Dzherlo, Krupnoplodnaya, PMR-1,                                                                 |
| H5               | 5.4                                            | Bertiolle, Schneiders, Kordia, Krupnoplodnaya                                                                                                         |
| H6               | 6.4                                            | Early Burlat                                                                                                                                          |
| H7               | 0.9                                            | Schneiders                                                                                                                                            |
| H8               | 0.9                                            | MIM 17                                                                                                                                                |
| H9               | 0.9                                            | Cristobalina                                                                                                                                          |
| H10              | 1.8                                            | MIM 17                                                                                                                                                |
| H11              | 0.9                                            | MIM 23                                                                                                                                                |
| H12              | 0.9                                            | MIM 23                                                                                                                                                |
| H13              | 1.8                                            | NY 54                                                                                                                                                 |
| H14              | 0.0                                            | *                                                                                                                                                     |
| H15              | 0.0                                            | *                                                                                                                                                     |
| H16              | 0.0                                            | *                                                                                                                                                     |

  

| <b>Haplotype</b> | <b>Frequency in eight sour cherry individuals</b> | <b>Individual (s) exhibiting the haplotype</b>                                                          |
|------------------|---------------------------------------------------|---------------------------------------------------------------------------------------------------------|
| H1               | 3.1                                               | M172                                                                                                    |
| H2               | 0.0                                               | *                                                                                                       |
| H3               | 46.9                                              | 25-02-29, M172, Montmorency, 25-14-20, Balaton, Surefire, Rheinische Schattenmorelle, Englaise Timpurii |
| H4               | 0.0                                               | *                                                                                                       |
| H5               | 0.0                                               | *                                                                                                       |
| H6               | 0.0                                               | *                                                                                                       |
| H7               | 0.0                                               | *                                                                                                       |

|     |      |                                                         |
|-----|------|---------------------------------------------------------|
| H8  | 3.1  | 25-02-29                                                |
| H9  | 0.0  | *                                                       |
| H10 | 12.5 | 25-02-29, M172, Montmorency, Rheinische Schattenmorelle |
| H11 | 18.8 | 25-02-29, M172, 25-14-20, Balaton                       |
| H12 | 3.1  | Surefire                                                |
| H13 | 0.0  | *                                                       |
| H14 | 3.1  | Montmorency                                             |
| H15 | 6.2  | Balaton, Englaise Timpurii                              |
| H16 | 3.1  | Englaise Timpurii                                       |

---

**Table S4.** The nine haplotypes identified for the eight sour cherry parents for the fruit firmness QTL *qP-FF4.1*. The letters assigned to the haplotypes are the designations given in Cai *et al.*<sup>3</sup>. The haplotype nomenclature assigned in Fig. 5 is also included in the last column.

| SNP                    | ss490552883 | ss490559054 | ss490552906 | ss490552912 | ss490552928 |   |     |
|------------------------|-------------|-------------|-------------|-------------|-------------|---|-----|
| Chromosome             | 4           | 4           | 4           | 4           | 4           |   |     |
| Physical position (bp) | 10,241,247  | 10,414,884  | 10,880,163  | 11,044,975  | 11,472,398  |   |     |
| Genetic position (cM)  | 33.5        | 33.6        | 33.7        | 33.7        | 33.8        |   |     |
| 25-02-29               | <i>a</i>    | B           | B           | B           | A           | A | H3  |
|                        | <i>b</i>    | B           | A           | B           | B           | A | H11 |
|                        | <i>c</i>    | A           | A           | B           | B           | A | H8  |
|                        | <i>d</i>    | A           | B           | A           | B           | A | H10 |
| M172                   | <i>d</i>    | A           | B           | A           | B           | A | H10 |
|                        | <i>e</i>    | B           | B           | B           | A           | A | H3  |
|                        | <i>f</i>    | B           | B           | A           | B           | B | H1  |
|                        | <i>h</i>    | B           | A           | B           | B           | A | H11 |
| Montmorency            | <i>a</i>    | B           | B           | B           | A           | A | H3  |
|                        | <i>d</i>    | A           | B           | A           | B           | A | H10 |
|                        | <i>i</i>    | B           | B           | B           | A           | A | H3  |
|                        | <i>l</i>    | A           | A           | A           | B           | A | H14 |
| 25-14-20               | <i>a</i>    | B           | B           | B           | A           | A | H3  |
|                        | <i>g</i>    | B           | B           | B           | A           | A | H3  |
|                        | <i>h</i>    | B           | A           | B           | B           | A | H11 |
|                        | <i>j</i>    | B           | A           | B           | B           | A | H11 |
| Balaton                | <i>a</i>    | B           | B           | B           | A           | A | H3  |
|                        | <i>h</i>    | B           | A           | B           | B           | A | H11 |
|                        | <i>k</i>    | B           | B           | B           | A           | A | H3  |

|                            |          |   |   |   |   |   |     |
|----------------------------|----------|---|---|---|---|---|-----|
|                            | <i>n</i> | A | A | B | A | B | H15 |
| Surefire                   | <i>g</i> | B | B | B | A | A | H3  |
|                            | <i>i</i> | B | B | B | A | A | H3  |
|                            | <i>k</i> | B | B | B | A | A | H3  |
|                            | <i>o</i> | A | A | B | B | B | H12 |
| Rheinische Schattenmorelle | <i>b</i> | B | A | B | B | A | H11 |
|                            | <i>d</i> | A | B | A | B | A | H10 |
|                            | <i>g</i> | B | B | B | A | A | H3  |
|                            | <i>i</i> | B | B | B | A | A | H3  |
| Englaise Timpurii          | <i>a</i> | B | B | B | A | A | H3  |
|                            | <i>m</i> | B | B | B | A | A | H3  |
|                            | <i>n</i> | A | A | B | A | B | H15 |
|                            | <i>p</i> | A | B | B | B | B | H16 |

---

**Table S5.** This table is considered as a large supplementary dataset and therefore included as a separate Excel document

(Supplementary Dataset).

**Table S6.** SNP information in the *qP-FF4.1* region. The physical positions of SNPs were based on peach genome v2.0<sup>4</sup>.

| <b>SNP</b>  | <b>Chromosome</b> | <b>Physical position (bp)</b> | <b>Genetic position (cM)</b> |
|-------------|-------------------|-------------------------------|------------------------------|
| ss490552880 | 4                 | 10156468                      | 31.9                         |
| ss490559401 | 4                 | 10195053                      | 33.5                         |
| ss490559398 | 4                 | 10195120                      | 33.5                         |
| ss490559396 | 4                 | 10195144                      | 33.5                         |
| ss490559107 | 4                 | 10236421                      | 33.5                         |
| ss490552883 | 4                 | 10241247                      | 33.5                         |
| ss490559054 | 4                 | 10414884                      | 33.6                         |
| ss490552906 | 4                 | 10880163                      | 33.7                         |
| ss490552912 | 4                 | 11044975                      | 33.7                         |
| ss490552928 | 4                 | 11472398                      | 33.8                         |
| ss490552931 | 4                 | 11520743                      | 33.8                         |
| ss490548726 | 4                 | 11661240                      | 33.9                         |
| ss490552936 | 4                 | 11661765                      | 33.9                         |
| ss490552942 | 4                 | 11956655                      | 33.9                         |



## References

1. Voorrips, R. E., Bink, M. C. A. M. & van de Weg, W. E. Pedimap: software for the visualization of genetic and phenotypic data in pedigrees. *J. Hered.* **103(6)**, 903-7 (2012).
2. Yoo, S. D., Gao, Z., Cantini, C., Loescher, W. H. & van Nocker, S. Fruit ripening in sour cherry: Changes in expression of genes encoding expansins and other cell-wall-modifying enzymes. *J. Amer. Soc. Hort. Sci.* **128**, 16-22 (2003).
3. Cai, L. *et al.* Identification of bloom date QTLs and haplotype analysis in tetraploid sour cherry (*Prunus cerasus*). *Tree Genet. Genomes* **14**, 22 (2018).
4. Verde, I. *et al.* The Peach v2.0 release: high-resolution linkage mapping and deep resequencing improve chromosome-scale assembly and contiguity. *BMC Genomics* **18(1)**, 225 (2017).
